# Supplementary material
Source: publisher figshare collection journal article supplement (https://tandf.figshare.com/ndownloader/files/17853626)
Supplement: Supplementary file 1 [file 17853626]

**Figures list**

| Figure 1 | Schematic of the capillary wick evaporation system with vacuum steam side |
| --- | --- |
| Figure 2 | Evaporator structure |
| Figure 3 | Sintered porous wick |
| Figure 4 | The liquid aggregated near the bottom of capillary wick |
| Figure 5 (a) | Steam side of the vacuum capillary wick evaporation system device diagram(a) Volume of condensate at different preheat temperatures |
| Figure 5 (6) | Steam side of the vacuum capillary wick evaporation system device diagram(b) Concentrate concentration at different preheat temperatures |

**Experimental data**

| Preheat temperature/℃ | Volume of condensate/ml | | concentration of concentrate/% | |
| --- | --- | --- | --- | --- |
| Capillary core | A | B | A | B |
| 90 | 10.4 | 12.9 | 10.9 | 11.6 |
| 95 | 13.4 | 17.7 | 11.2 | 11.8 |
| 100 | 19.6 | 21.2 | 11.9 | 12.3 |
| 105 | 20.7 | 24 | 12 | 12.6 |
